# Supplementary material for: Genome-wide identification of candidate aquaporins involved in water accumulation of pomegranate outer seed coat
Source: PeerJ. 2021 Jul 15;9:e11810. doi: 10.7717/peerj.11810 (PMC8286702; doi:10.7717/peerj.11810)
Supplement: Supplemental Information 1 [file peerj-09-11810-s001.xlsx]

## Sheet: Figure 5A Raw data
MWXS-18-106-total.read.counts.annotation.xlsx		D-50-1	D-50-2	D-50-3	D-I-140-1	D-I-140-2	D-I-140-3	D-I-95-1	D-I-95-2	D-I-95-3	D-O-140-1	D-O-140-2	D-O-140-3	D-O-95-1	D-O-95-2	D-O-95-3	T-50-1	T-50-2	T-50-3	T-I-140-1	T-I-140-2	T-I-140-3	T-I-95-1	T-I-95-2	T-I-95-3	T-O-140-1	T-O-140-2	T-O-140-3	T-O-95-1	T-O-95-2	T-O-95-3	GO	KEGG	KOG	NR	SwissProt	TrEMBL
Pgr001109.1	PgNIP1.1	9.057	0.555953	0.561548	0.206114	0.189843	0.274638	0.760497	2.96056	5.91405	1.06906	0.71588	1.48043	2.17251	3.41891	6.71253	1.95702	9.33879	2.3724	0.432236	1.34426	0.398934	1.90418	0.688025	2.00344	4.03767	3.0899	2.34899	2.20277	0.277171	1.12017	GO:0005887,integral component of plasma membrane; GO:0005886,plasma membrane; GO:0015105,arsenite transmembrane transporter activity; GO:0015250,water channel activity; GO:0015700,arsenite transport; GO:0080170,hydrogen peroxide transmembrane transport; GO:0046685,response to arsenic-containing substance	K09874: NIP; aquaporin NIP	At4g18910	gb|OWM72995.1|	NIP12_ARATH,RecName: Full=Aquaporin NIP1-2; AltName: Full=NOD26-like intrinsic protein 1-2; Short=AtNIP1;2; AltName: Full=Nodulin-26-like major intrinsic protein 2; Short=NodLikeMip2; Short=Protein NLM2;	A0A218WJL2_PUNGR,SubName: Full=Uncharacterized protein {ECO:0000313|EMBL:OWM72995.1};
Pgr020361.1	PgNIP1.2	2.70525	1.41922	1.37324	0.363579	0.512079	0.89273	0.657492	0.328816	3.61398	2.83061	1.44969	2.68634	1.00427	1.06764	1.50398	6.039	2.44913	8.02962	0.670371	1.05492	0.619159	5.35108	4.40379	2.84468	6.35888	10.8955	12.3186	4.03254	1.79177	3.88091	GO:0016021,integral component of membrane; GO:0015267,channel activity	--	At5g37820	gb|OWM64394.1|	NIP1_NICAL,RecName: Full=Probable aquaporin NIP-type; AltName: Full=Pollen-specific membrane integral protein;	A0A218VV11_PUNGR,SubName: Full=Uncharacterized protein {ECO:0000313|EMBL:OWM64394.1};
Pgr011045.1	PgNIP1.3	0.047569	0.210876	0	0	0	0	0	0	0.270364	0	0	0	0	0	0.13008	0.472359	0.322345	0.78998	0	0	0	0	0.118129	0	0	0.108336	0.135622	0.806742	0.61183	0.175012	GO:0016021,integral component of membrane; GO:0015267,channel activity	K09874: NIP; aquaporin NIP	At5g37820	gb|OWM86221.1|	NIP1_NICAL,RecName: Full=Probable aquaporin NIP-type; AltName: Full=Pollen-specific membrane integral protein;	A0A218XNZ9_PUNGR,SubName: Full=Uncharacterized protein {ECO:0000313|EMBL:OWM86221.1};
Pgr022225.1	PgNIP2.1	0.296994	0.94042	0.292676	27.9521	19.2327	10.809	0.992447	1.78744	0.156366	0	0	0.121295	0	0.234421	0	0	0.15323	0	3.23193	3.00131	4.22539	0.779172	1.30106	1.78127	0	0	0.101242	0	0.111338	0	GO:0016021,integral component of membrane; GO:0015267,channel activity; GO:0015840,urea transport	K09874: NIP; aquaporin NIP	At5g37820	gb|OWM73954.1|	NIP21_MAIZE,RecName: Full=Aquaporin NIP2-1; AltName: Full=NOD26-like intrinsic protein 2-1; AltName: Full=ZmNIP2-1; AltName: Full=ZmNIP2;1;	A0A218WM83_PUNGR,SubName: Full=Uncharacterized protein {ECO:0000313|EMBL:OWM73954.1};
Pgr026828.1	PgNIP4.1	18.1481	15.6019	2.2479	19.6492	12.0251	9.75988	3.15826	0.762872	21.6152	12.7415	9.26625	9.35327	0.534205	0.452342	1.27659	5.16921	14.6176	6.71861	8.32852	5.54284	25.0909	20.5065	17.2425	19.5108	5.62573	2.88508	8.17235	2.00233	1.91682	1.71759	GO:0005887,integral component of plasma membrane; GO:0015250,water channel activity; GO:0034220,ion transmembrane transport	--	At4g18910	gb|OWM73724.1|	NIP11_ORYSJ,RecName: Full=Aquaporin NIP1-1; AltName: Full=NOD26-like intrinsic protein 1-1; AltName: Full=OsNIP1;1;	A0A218WLL6_PUNGR,SubName: Full=Uncharacterized protein {ECO:0000313|EMBL:OWM73724.1};
Pgr018145.1	PgNIP5.1	5.61343	5.81708	0.730474	1.05016	0.658354	0.357819	0.556169	0.758453	5.03869	0.202965	0	0	0	0.09849	0.116342	6.81342	5.23972	6.66797	2.97684	0.585185	0.912563	3.12357	2.70297	3.07795	0.644863	1.27869	0.864308	0.056469	0.120326	0.269331	GO:0005887,integral component of plasma membrane; GO:0016328,lateral plasma membrane; GO:0005886,plasma membrane; GO:0046715,active borate transmembrane transporter activity; GO:0015105,arsenite transmembrane transporter activity; GO:0015250,water channel activity; GO:0015700,arsenite transport; GO:0046713,borate transport; GO:0080029,cellular response to boron-containing substance levels; GO:004…	K09874: NIP; aquaporin NIP	At4g10380	gb|OWM72260.1|	NIP51_ARATH,RecName: Full=Probable aquaporin NIP5-1; AltName: Full=NOD26-like intrinsic protein 5-1; Short=AtNIP5;1; AltName: Full=Nodulin-26-like major intrinsic protein 6; Short=NodLikeMip6; Short=Protein NLM6;	A0A218WIQ7_PUNGR,SubName: Full=Uncharacterized protein {ECO:0000313|EMBL:OWM72260.1};
Pgr008524.1	PgNIP7.1	0	0	0	0	0	0	0.050266	0	0	0.0684	0	0	0	0	0	0	0	0	0	0	0	0.061131	0	0.178337	0.177731	0.173321	0	0.135229	0.169899	0.425456	GO:0005887,integral component of plasma membrane; GO:0046715,active borate transmembrane transporter activity; GO:0015250,water channel activity; GO:0035445,borate transmembrane transport	K09874: NIP; aquaporin NIP	At3g06100	gb|OWM74211.1|	NIP71_ARATH,RecName: Full=Probable aquaporin NIP7-1; AltName: Full=NOD26-like intrinsic protein 7-1; Short=AtNIP7;1;	A0A218WPQ1_PUNGR,SubName: Full=Uncharacterized protein {ECO:0000313|EMBL:OWM74211.1};
Pgr007040.1	PgNIP8.1	0	0	0	0	0	0	0.120116	0	0	0	0	0	0	0	0	0	0	0	0.138905	0.278408	0	0	0	0	0.120639	0.113356	0	0	0	0	GO:0005887,integral component of plasma membrane; GO:0043661,peribacteroid membrane; GO:0015250,water channel activity; GO:0034220,ion transmembrane transport; GO:0009877,nodulation	K09874: NIP; aquaporin NIP	At5g37820	gb|OWM81009.1|	NO26_SOYBN,RecName: Full=Nodulin-26; Short=N-26;	A0A218X8H8_PUNGR,SubName: Full=Uncharacterized protein {ECO:0000313|EMBL:OWM81009.1};
Pgr022638.1	PgTIP1.1	0.098018	0.49006	8.22666	4.30421	2.00301	9.28128	6.76369	58.4538	0.214198	1.02376	0.199171	0.885373	0.385695	0.396771	3.90554	0.382785	0.368722	0.55251	0.401245	2.97646	2.15759	0.105081	0.252645	0.686439	1.83357	1.83195	5.39529	0.104364	0.500976	0	GO:0042807,central vacuole; GO:0005887,integral component of plasma membrane; GO:0009705,plant-type vacuole membrane; GO:0015204,urea transmembrane transporter activity; GO:0015250,water channel activity; GO:0034220,ion transmembrane transport; GO:0015840,urea transport; GO:0006833,water transport	K09873: TIP; aquaporin TIP	At4g01470	gb|OWM87526.1|	TIP13_ARATH,RecName: Full=Aquaporin TIP1-3; AltName: Full=Gamma-tonoplast intrinsic protein 3; Short=Gamma-TIP3; AltName: Full=Tonoplast intrinsic protein 1-3; Short=AtTIP1;3;	A0A218XS97_PUNGR,SubName: Full=Uncharacterized protein {ECO:0000313|EMBL:OWM87526.1};
Pgr024068.1	PgTIP1.2	2.2028	0	0	0.110882	0	0	0	0	0.255763	0.486153	0.094536	0	0.128851	0.12277	0.139334	4.69949	3.63111	10.8708	0	0.142505	0	0	0	0	0	0.1653	0	0	0	0	GO:0042807,central vacuole; GO:0005887,integral component of plasma membrane; GO:0009705,plant-type vacuole membrane; GO:0015204,urea transmembrane transporter activity; GO:0015250,water channel activity; GO:0034220,ion transmembrane transport; GO:0015840,urea transport; GO:0006833,water transport	K09873: TIP; aquaporin TIP	At4g01470	gb|OWM89323.1|	TIP13_ARATH,RecName: Full=Aquaporin TIP1-3; AltName: Full=Gamma-tonoplast intrinsic protein 3; Short=Gamma-TIP3; AltName: Full=Tonoplast intrinsic protein 1-3; Short=AtTIP1;3;	A0A218XWG9_PUNGR,SubName: Full=Uncharacterized protein {ECO:0000313|EMBL:OWM89323.1};
Pgr025529.1	PgTIP1.4	13.7922	15.3703	36.5145	20.7454	24.4071	17.1764	13.2364	51.8608	15.3014	6.8425	6.67957	2.98643	0.476486	2.40392	4.07118	14.1737	12.4405	9.30165	6.43943	16.8203	18.4917	2.03365	1.44355	2.24342	2.36326	1.90368	3.8073	0.442516	0	0.126867	GO:0042807,central vacuole; GO:0009941,chloroplast envelope; GO:0005887,integral component of plasma membrane; GO:0009705,plant-type vacuole membrane; GO:0000326,protein storage vacuole; GO:0005774,vacuolar membrane; GO:0005773,vacuole; GO:0015204,urea transmembrane transporter activity; GO:0015250,water channel activity; GO:0080170,hydrogen peroxide transmembrane transport; GO:0034220,ion transm…	K09873: TIP; aquaporin TIP	At2g36830	gb|OWM69680.1|	TIP11_ARATH,RecName: Full=Aquaporin TIP1-1; AltName: Full=Aquaporin TIP; AltName: Full=Gamma-tonoplast intrinsic protein; Short=Gamma-TIP; AltName: Full=Tonoplast intrinsic protein 1-1; Short=AtTIP1;1; AltName: Full=Tonoplast intrinsic protein, root-specific RB7;	A0A218WBG2_PUNGR,SubName: Full=Uncharacterized protein {ECO:0000313|EMBL:OWM69680.1};
Pgr002039.1	PgTIP1.6	3.27757	5.38292	0.227884	0.228197	0	0	0.097719	0	5.12554	0.982265	0.806623	0.465992	0	0.434276	0.349717	0.614028	1.26962	0.381522	0	0.115475	0.273102	0	0	0	0.241737	0.260588	0.47556	0	0	0	GO:0042807,central vacuole; GO:0009941,chloroplast envelope; GO:0005887,integral component of plasma membrane; GO:0009705,plant-type vacuole membrane; GO:0000326,protein storage vacuole; GO:0005774,vacuolar membrane; GO:0005773,vacuole; GO:0015204,urea transmembrane transporter activity; GO:0015250,water channel activity; GO:0080170,hydrogen peroxide transmembrane transport; GO:0034220,ion transm…	K09873: TIP; aquaporin TIP	At2g36830	gb|OWM82465.1|	TIP11_ARATH,RecName: Full=Aquaporin TIP1-1; AltName: Full=Aquaporin TIP; AltName: Full=Gamma-tonoplast intrinsic protein; Short=Gamma-TIP; AltName: Full=Tonoplast intrinsic protein 1-1; Short=AtTIP1;1; AltName: Full=Tonoplast intrinsic protein, root-specific RB7;	A0A218XB73_PUNGR,SubName: Full=Uncharacterized protein {ECO:0000313|EMBL:OWM82465.1};
Pgr024066.1	PgTIP1.7	0.16014	12.6173	0.984383	0.089853	0.98764	0.970402	0.975954	0.454464	1.70996	0.055077	0.114385	0	0	0	0.095676	0	0	0	0.123176	0.392502	0	6.3232	2.48374	0.997712	0	0	0.235168	0	0	0	GO:0042807,central vacuole; GO:0005887,integral component of plasma membrane; GO:0009705,plant-type vacuole membrane; GO:0015204,urea transmembrane transporter activity; GO:0015250,water channel activity; GO:0034220,ion transmembrane transport; GO:0015840,urea transport; GO:0006833,water transport	--	At4g01470	gb|OWM89321.1|	TIP13_ARATH,RecName: Full=Aquaporin TIP1-3; AltName: Full=Gamma-tonoplast intrinsic protein 3; Short=Gamma-TIP3; AltName: Full=Tonoplast intrinsic protein 1-3; Short=AtTIP1;3;	A0A218XXU1_PUNGR,SubName: Full=Uncharacterized protein {ECO:0000313|EMBL:OWM89321.1};
Pgr026848.1	PgTIP1.8	13.0095	20.1616	0.099655	0.383741	0	0.5477	0.264001	0.184766	24.5074	1.01587	2.01811	7.30979	6.53288	2.62238	2.95396	14.7039	33.9892	31.4037	0.109848	0.304192	3.12974	2.32255	2.10165	1.54467	20.5574	33.6954	42.7577	25.2588	8.8806	12.6825	GO:0042807,central vacuole; GO:0009941,chloroplast envelope; GO:0005887,integral component of plasma membrane; GO:0009705,plant-type vacuole membrane; GO:0000326,protein storage vacuole; GO:0005774,vacuolar membrane; GO:0005773,vacuole; GO:0015204,urea transmembrane transporter activity; GO:0015250,water channel activity; GO:0080170,hydrogen peroxide transmembrane transport; GO:0034220,ion transm…	K09873: TIP; aquaporin TIP	At2g36830	gb|OWM73744.1|	TIP11_ARATH,RecName: Full=Aquaporin TIP1-1; AltName: Full=Aquaporin TIP; AltName: Full=Gamma-tonoplast intrinsic protein; Short=Gamma-TIP; AltName: Full=Tonoplast intrinsic protein 1-1; Short=AtTIP1;1; AltName: Full=Tonoplast intrinsic protein, root-specific RB7;	A0A218WLN4_PUNGR,SubName: Full=Uncharacterized protein {ECO:0000313|EMBL:OWM73744.1};
Pgr014941.1	PgTIP2.1	1.19267	44.7383	0.105372	0.171182	0.105715	0.126565	0	0.317583	8.30404	0	0	0	0	0.124742	0	4.09359	1.03598	1.16171	0	0.289589	0.414588	0	0.097189	0	0	0	0	0	0	0	GO:0005618,cell wall; GO:0042807,central vacuole; GO:0009507,chloroplast; GO:0009941,chloroplast envelope; GO:0005794,Golgi apparatus; GO:0005887,integral component of plasma membrane; GO:0009505,plant-type cell wall; GO:0009705,plant-type vacuole membrane; GO:0005886,plasma membrane; GO:0009506,plasmodesma; GO:0000326,protein storage vacuole; GO:0005774,vacuolar membrane; GO:0005773,vacuole; GO:…	K09873: TIP; aquaporin TIP	At3g16240	gb|OWM78122.1|	TIP21_ARATH,RecName: Full=Aquaporin TIP2-1; AltName: Full=Delta-tonoplast intrinsic protein; Short=Delta-TIP; AltName: Full=Tonoplast intrinsic protein 2-1; Short=AtTIP2;1; Contains: RecName: Full=Aquaporin TIP2-1, N-terminally processed;	A0A218X1A3_PUNGR,SubName: Full=Uncharacterized protein {ECO:0000313|EMBL:OWM78122.1};
Pgr021515.1	PgTIP2.3	74.5588	56.5909	1.538	0	0.384411	1.23673	1.13577	1.36623	61.9973	0.109496	0	0.245829	0	0.077434	0.421333	261.413	102.555	152.96	0.169647	0.285845	2.17021	8.23867	7.20526	25.0641	0.124485	0	0.127699	5.483	5.84017	6.1862	GO:0042807,central vacuole; GO:0009507,chloroplast; GO:0005887,integral component of plasma membrane; GO:0009705,plant-type vacuole membrane; GO:0005774,vacuolar membrane; GO:0005773,vacuole; GO:0015250,water channel activity; GO:0034220,ion transmembrane transport	K09873: TIP; aquaporin TIP	At4g17340	gb|OWM86428.1|	TIP22_ARATH,RecName: Full=Probable aquaporin TIP2-2; AltName: Full=Tonoplast intrinsic protein 2-2; Short=AtTIP2;2;	A0A218XNS4_PUNGR,SubName: Full=Uncharacterized protein {ECO:0000313|EMBL:OWM86428.1};
Pgr015644.1	PgTIP4.1	7.0216	1.66077	0	0	0	0	0	0	5.46849	0	0	0	0.126191	0	0	7.85979	4.55158	4.8549	0	0	0	1.14846	1.33861	0.690406	0	0	0	0.383688	0.297425	0	GO:0042807,central vacuole; GO:0005887,integral component of plasma membrane; GO:0009705,plant-type vacuole membrane; GO:0015250,water channel activity; GO:0034220,ion transmembrane transport	K09873: TIP; aquaporin TIP	At2g25810	gb|OWM86609.1|	TIP41_ARATH,RecName: Full=Aquaporin TIP4-1; AltName: Full=Epsilon-tonoplast intrinsic protein; Short=Epsilon-TIP; AltName: Full=Tonoplast intrinsic protein 4-1; Short=AtTIP4;1;	A0A218XPJ5_PUNGR,SubName: Full=Uncharacterized protein {ECO:0000313|EMBL:OWM86609.1};
Pgr019318.1	PgTIP5.1	1.54992	0.305371	0	0	0	0	0	0.061651	0.939339	0	0.141324	0	0	0	0	0.748071	0.113783	0.650394	0	0	0	1.02256	0.477362	0.506597	0	0	0.063183	0	0.157696	0	GO:0005618,cell wall; GO:0042807,central vacuole; GO:0009507,chloroplast; GO:0009941,chloroplast envelope; GO:0005794,Golgi apparatus; GO:0005887,integral component of plasma membrane; GO:0009505,plant-type cell wall; GO:0009705,plant-type vacuole membrane; GO:0005886,plasma membrane; GO:0009506,plasmodesma; GO:0000326,protein storage vacuole; GO:0005774,vacuolar membrane; GO:0005773,vacuole; GO:…	K09873: TIP; aquaporin TIP	At3g16240	gb|OWM80154.1|	TIP21_ARATH,RecName: Full=Aquaporin TIP2-1; AltName: Full=Delta-tonoplast intrinsic protein; Short=Delta-TIP; AltName: Full=Tonoplast intrinsic protein 2-1; Short=AtTIP2;1; Contains: RecName: Full=Aquaporin TIP2-1, N-terminally processed;	A0A218X5D9_PUNGR,SubName: Full=Uncharacterized protein {ECO:0000313|EMBL:OWM80154.1};
Pgr021863.1	PgTIP5.2	0.504173	0.216552	0.357848	0	0	0	0	0.224487	0.200806	0	0	0	0	0	0	0.37456	0.703119	0.662147	0.0906	0	0	0.936848	0.085382	0.891956	0	0.294491	0	0	0	0	GO:0042807,central vacuole; GO:0005887,integral component of plasma membrane; GO:0005739,mitochondrion; GO:0009705,plant-type vacuole membrane; GO:0090406,pollen tube; GO:0015204,urea transmembrane transporter activity; GO:0015250,water channel activity; GO:0034220,ion transmembrane transport; GO:0048235,pollen sperm cell differentiation; GO:0015840,urea transport	K09873: TIP; aquaporin TIP	At3g47440	gb|OWM75698.1|	TIP51_ARATH,RecName: Full=Probable aquaporin TIP5-1; AltName: Full=Tonoplast intrinsic protein 5-1; Short=AtTIP5;1;	A0A218WT77_PUNGR,SubName: Full=Uncharacterized protein {ECO:0000313|EMBL:OWM75698.1};
Pgr022546.1	PgPIP1.1	172.159	482.245	589.705	51.6014	41.1456	46.8067	577.497	357.462	487.389	0.838987	3.98185	1.96803	2.54839	5.13186	4.56393	69.2704	204.895	75.9114	18.8411	25.4834	18.6531	999.35	1232.55	883.694	1.42233	0.757765	0.866495	7.4556	21.9843	9.8074	GO:0005887,integral component of plasma membrane; GO:0015250,water channel activity; GO:0034220,ion transmembrane transport	K09872: PIP; aquaporin PIP	At4g00430	gb|OWM87435.1|	PIP12_ORYSJ,RecName: Full=Probable aquaporin PIP1-2; AltName: Full=OsPIP1;2; AltName: Full=Plasma membrane intrinsic protein 1-2;	A0A218XQG8_PUNGR,SubName: Full=Uncharacterized protein {ECO:0000313|EMBL:OWM87435.1};
Pgr017938.1	PgPIP1.2	1631.8	1752.46	1385.09	2268.04	1888.93	2261.15	1450.38	1497.36	1612.51	1795.7	2234.99	2384.17	2697.95	2247.95	2316.97	2415.92	2019.73	2432.97	1413.69	1051.16	1715.55	1326.71	1362.77	1750.53	3248.21	3277.75	3503.6	2914.04	3037.11	2912.48	GO:0005887,integral component of plasma membrane; GO:0015250,water channel activity; GO:0034220,ion transmembrane transport	K09872: PIP; aquaporin PIP	At2g45960	gb|OWM72055.1|	PIP12_ORYSJ,RecName: Full=Probable aquaporin PIP1-2; AltName: Full=OsPIP1;2; AltName: Full=Plasma membrane intrinsic protein 1-2;	A0A218WGW0_PUNGR,SubName: Full=Uncharacterized protein {ECO:0000313|EMBL:OWM72055.1};
Pgr028095.1	PgPIP1.3	0	0.104466	0.933936	0.14627	0	0	0.624124	0.841259	0	1.18667	0	0	0.410276	0.780752	0.765809	0	0.25405	0	0.417768	0.249406	0.370806	0.84913	0.336823	0	4.7277	2.91651	1.90749	0	0	0	GO:0009507,chloroplast; GO:0005887,integral component of plasma membrane; GO:0016020,membrane; GO:0005886,plasma membrane; GO:0015250,water channel activity; GO:0034220,ion transmembrane transport; GO:0009414,response to water deprivation; GO:0006833,water transport	--	At1g01620	gb|OWM85308.1|	PIP13_ARATH,RecName: Full=Aquaporin PIP1-3; Short=AtPIP1;3; AltName: Full=Plasma membrane intrinsic protein 1c; Short=PIP1c; AltName: Full=Transmembrane protein B; Short=TMP-B;	A0A218XKG2_PUNGR,SubName: Full=Uncharacterized protein {ECO:0000313|EMBL:OWM85308.1};
Pgr025826.1	PgPIP1.5	4.20807	25.3868	625.821	564.542	440.178	735.566	615.557	821.424	16.585	619.078	627.07	579.568	28.2786	35.7802	86.701	57.3434	100.33	72.9159	1662.91	1617.77	1122.94	16.9074	92.0907	216.116	602.63	459.037	965.316	41.472	136.619	173.674	GO:0005887,integral component of plasma membrane; GO:0015250,water channel activity; GO:0034220,ion transmembrane transport	K09872: PIP; aquaporin PIP	At2g45960	gb|OWM69977.1|	PIP12_ORYSJ,RecName: Full=Probable aquaporin PIP1-2; AltName: Full=OsPIP1;2; AltName: Full=Plasma membrane intrinsic protein 1-2;	A0A218WAS9_PUNGR,SubName: Full=Uncharacterized protein {ECO:0000313|EMBL:OWM69977.1};
Pgr019712.1	PgPIP2.1	718.483	749.203	368.1	35.7069	84.1213	121.504	359.337	312.412	797.771	106.454	129.135	237.344	188.012	134.874	168.851	1220.34	706.12	1289	305.61	329.637	156.852	656.953	633.19	679.501	514.91	522.886	581.228	604.768	603.176	599.677	GO:0005887,integral component of plasma membrane; GO:0016020,membrane; GO:0015250,water channel activity; GO:0034220,ion transmembrane transport; GO:0009737,response to abscisic acid	K09872: PIP; aquaporin PIP	At2g16850	gb|OWM80432.1|	PIP28_ARATH,RecName: Full=Probable aquaporin PIP2-8; AltName: Full=Plasma membrane intrinsic protein 2-8; Short=AtPIP2;8; AltName: Full=Plasma membrane intrinsic protein 3b; Short=PIP3b;	A0A218X7R8_PUNGR,SubName: Full=Uncharacterized protein {ECO:0000313|EMBL:OWM80432.1};
Pgr022703.1	PgPIP2.2	55.0472	139.221	126.525	74.1043	59.7736	58.8394	116.853	284.973	76.5166	16.2905	14.4216	5.01972	1.62925	2.11773	6.34218	74.3049	77.5214	69.7825	98.7496	76.9998	153.351	83.1264	75.1124	96.1508	25.6804	19.3033	36.452	6.55438	14.0516	3.53786	GO:0016021,integral component of membrane; GO:0005886,plasma membrane; GO:0015250,water channel activity	K09872: PIP; aquaporin PIP	At2g37170	gb|OWM87591.1|	PIP24_MAIZE,RecName: Full=Aquaporin PIP2-4; AltName: Full=Plasma membrane intrinsic protein 2-4; AltName: Full=ZmPIP2-4; AltName: Full=ZmPIP2;4;	A0A218XST5_PUNGR,SubName: Full=Uncharacterized protein {ECO:0000313|EMBL:OWM87591.1};
Pgr028184.1	PgPIP2.4	751.778	546.462	435.179	455.928	426.946	746.605	318.751	293.072	661.036	2288.54	2526.92	2561.86	2391.18	2041.33	2267.83	556.023	567.636	622.241	194.907	145.991	416.088	210.227	186.813	292.765	2048.54	2120.72	2167.13	1300.12	1135.01	1414.4	GO:0016021,integral component of membrane; GO:0005886,plasma membrane; GO:0015250,water channel activity	K09872: PIP; aquaporin PIP	At5g60660	gb|OWM84192.1|	PIP27_MAIZE,RecName: Full=Aquaporin PIP2-7; AltName: Full=Plasma membrane intrinsic protein 2-7; AltName: Full=ZmPIP2-7; AltName: Full=ZmPIP2;7;	A0A218XIM6_PUNGR,SubName: Full=Uncharacterized protein {ECO:0000313|EMBL:OWM84192.1};
Pgr001978.1	PgPIP2.5	55.65	134.568	325.367	56.1649	73.7273	260.469	357.544	405.261	134.611	16.5813	15.3375	17.5052	5.40259	10.5543	34.0468	142.531	179.508	111.565	51.5459	306.944	130.936	31.1598	64.1449	143.866	63.0144	67.4348	237.14	63.6513	96.3539	75.1173	GO:0016021,integral component of membrane; GO:0005886,plasma membrane; GO:0015250,water channel activity	K09872: PIP; aquaporin PIP	At2g37170	gb|OWM82404.1|	PIP24_MAIZE,RecName: Full=Aquaporin PIP2-4; AltName: Full=Plasma membrane intrinsic protein 2-4; AltName: Full=ZmPIP2-4; AltName: Full=ZmPIP2;4;	A0A218XBV1_PUNGR,SubName: Full=Uncharacterized protein {ECO:0000313|EMBL:OWM82404.1};
Pgr025571.1	PgPIP2.6	159.058	151.085	950.704	198.208	299.066	494.854	822.043	372.823	156.306	23.7219	30.9657	42.101	68.7993	84.0397	81.0948	712.807	369.456	726.675	349.953	474.402	186.527	166.507	250.091	448.173	175.825	126.447	342.27	207.577	304.905	246.238	GO:0009507,chloroplast; GO:0005887,integral component of plasma membrane; GO:0016020,membrane; GO:0005886,plasma membrane; GO:0009506,plasmodesma; GO:0005773,vacuole; GO:0003729,mRNA binding; GO:0031625,ubiquitin protein ligase binding; GO:0015250,water channel activity; GO:0080170,hydrogen peroxide transmembrane transport; GO:0034220,ion transmembrane transport; GO:0009737,response to abscisic a…	K09872: PIP; aquaporin PIP	At3g53420	gb|OWM69722.1|	PIP21_ARATH,RecName: Full=Aquaporin PIP2-1; AltName: Full=Plasma membrane intrinsic protein 2-1; Short=AtPIP2;1; AltName: Full=Plasma membrane intrinsic protein 2a; Short=PIP2a;	A0A218WCB1_PUNGR,SubName: Full=Uncharacterized protein {ECO:0000313|EMBL:OWM69722.1};
Pgr026040.1	PgPIP2.7	0.06272	0	0.566912	3.67814	0.740852	1.26096	0.571334	0.555549	0	0	0	0	0	0	0	1.71111	0	0.18145	0.510553	0.151155	0.666407	0.861219	2.74177	1.6387	0.11002	0	0	0	0	0	GO:0005887,integral component of plasma membrane; GO:0015250,water channel activity; GO:0034220,ion transmembrane transport; GO:0006833,water transport	K09872: PIP; aquaporin PIP	At3g54820	gb|OWM70190.1|	PIP25_ARATH,RecName: Full=Probable aquaporin PIP2-5; AltName: Full=Plasma membrane intrinsic protein 2-5; Short=AtPIP2;5; AltName: Full=Plasma membrane intrinsic protein 2d; Short=PIP2d;	A0A218WCY0_PUNGR,SubName: Full=Uncharacterized protein {ECO:0000313|EMBL:OWM70190.1};
Pgr026039.1	PgPIP2.8	2.01319	0.10626	2.72388	2.0712	1.16873	0.566804	0.958689	0.740333	3.6147	0	0	0	0.112412	0	0	0.22019	3.63969	0.826485	0.855812	0.087853	0.432176	1.99299	0.386364	1.20887	0.350401	0.263511	0	0	0.203479	0.086149	GO:0005887,integral component of plasma membrane; GO:0015250,water channel activity; GO:0034220,ion transmembrane transport; GO:0006833,water transport	K09872: PIP; aquaporin PIP	At3g54820	gb|OWM70189.1|	PIP25_ARATH,RecName: Full=Probable aquaporin PIP2-5; AltName: Full=Plasma membrane intrinsic protein 2-5; Short=AtPIP2;5; AltName: Full=Plasma membrane intrinsic protein 2d; Short=PIP2d;	A0A218WCF3_PUNGR,SubName: Full=Uncharacterized protein {ECO:0000313|EMBL:OWM70189.1};
Pgr019637.1	PgXIP1.1	2.00938	2.92499	0.082958	0.357699	0.326616	0.190665	0.227944	0	6.15387	0	0	0.101079	0	0	0	0	0.779374	0.269423	0	0	0	0.075741	0	0	0	0	0	0	0	0	--	--	At2g16850	gb|OWM80357.1|	--	A0A218X5X1_PUNGR,SubName: Full=Uncharacterized protein {ECO:0000313|EMBL:OWM80357.1};
Pgr023227.1	PgSIP1.1	5.92155	10.3121	14.7612	33.067	23.2942	18.3567	13.9313	9.029	8.75846	11.5038	16.2319	19.3488	14.2943	11.9892	13.8093	11.0518	6.37335	11.2107	21.3467	16.6836	13.8937	7.4443	7.81717	8.47221	11.1206	11.0914	8.83828	13.5972	13.5672	10.8284	GO:0016021,integral component of membrane; GO:0015267,channel activity	K09875: SIP; aquaporin SIP	At3g04090	gb|OWM79815.1|	SIP11_MAIZE,RecName: Full=Aquaporin SIP1-1; AltName: Full=Small basic intrinsic protein 1-1; AltName: Full=ZmSIP1-1; AltName: Full=ZmSIP1;1;	A0A218X3J4_PUNGR,SubName: Full=Uncharacterized protein {ECO:0000313|EMBL:OWM79815.1};
Pgr001365.1	PgSIP1.2	343.251	239.931	192.278	203.454	198.111	199.286	161.573	202.664	278.996	339.336	308.589	301.549	386.956	374.205	355.324	305.789	306.52	310.217	206.45	204.283	258.141	300.509	268.634	277.922	297.43	301.12	327.453	411.766	414.881	365.67	GO:0016021,integral component of membrane; GO:0015267,channel activity	K09875: SIP; aquaporin SIP	At3g04090	gb|OWM73251.1|	SIP12_MAIZE,RecName: Full=Aquaporin SIP1-2; AltName: Full=Small basic intrinsic protein 1-2; AltName: Full=ZmSIP1-2; AltName: Full=ZmSIP1;2;	A0A218WLX3_PUNGR,SubName: Full=Uncharacterized protein {ECO:0000313|EMBL:OWM73251.1};

## Sheet: Figure 5B Raw data
Gene ID	D-50	D-I-95	D-I-140	D-O-95	D-O-140	T-50	T-I-95	T-I-140	T-O-95	T-O-140
PgrrNIP1.1	3.3915	3.2117	0.223532	4.10132	1.08846	4.55607	1.53188	0.725142	1.20004	3.15885
PgrNIP1.2	1.83257	1.53343	0.589463	1.19197	2.32221	5.50591	4.19985	0.781482	3.23507	9.85766
PgrNIP1.3	0.0861483	0.0901213	0	0.04336	0	0.528228	0.0393763	0	0.531195	0.0813193
PgrNIP2.1	0.51003	0.978752	19.3313	0.0781403	0.0404317	0.0510767	1.28717	3.48621	0.0371127	0.0337473
PgrNIP4.1	11.9993	8.5121	13.8114	0.754377	10.4537	8.83514	19.0866	12.9874	1.87891	5.56106
PgrNIP5.1	4.05366	2.11777	0.688777	0.0716107	0.067655	6.24037	2.96816	1.49153	0.148709	0.929287
PgrNIP7.1	0	0.0167553	0	0	0.0228	1.74657	0.0798227	0	0.243528	0.117017
PgrNIP8.1	0	0.0167553	0	0	0	0	0	0.139104	0	0.0779983
PgrTIP1.1	2.93825	21.8106	5.19617	1.56267	0.702767	0.434672	0.348055	1.8451	0.20178	3.02027
PgrTIP1.2	0.734265	0.0852543	0.0369607	0.130318	0.193563	6.40047	0	0.0475017	0	0.0551
PgrTIP1.4	21.8923	26.7995	20.7763	2.3172	5.50283	11.9719	1.90687	13.9172	0.189794	2.69141
PgrTIP1.6	2.96279	1.74109	0.0760657	0.261331	0.751627	0.755056	0	0.129526	0	0.325962
PgrTIP1.7	4.58729	1.04679	0.682632	0.031892	0.0564873	0	3.26821	0.171893	0	0.0783893
PgrTIP1.8	11.0903	8.31871	0.31048	4.03641	3.44793	26.699	1.98962	1.18126	15.6073	32.3368
PgrTIP2.1	15.3455	2.87387	0.134487	0.0415807	0	2.09709	0.0323963	0.234726	0	0
PgrTIP2.3	44.2292	21.4998	0.540382	0.166256	0.118442	172.309	13.5027	0.875234	5.83646	0.0840613
PgrTIP4.1	2.89412	1.82283	0	0.0420637	0	5.75542	1.05916	0	0.227038	0
PgrTIP5.1	0.618432	0.333663	0	0	0.047108	0.504083	0.66884	0	0.0525653	0.021061
PgrTIP5.2	0.359524	0.141764	0	0	0	0.579942	0.638062	0.0302	0	0.0981637
PgrPIP1.1	414.703	474.116	46.5179	4.08139	2.26296	116.692	1038.53	20.9925	13.0824	1.01553
PgrPIP1.2	1589.79	1520.09	2139.37	2420.96	2138.29	2289.54	1480	1393.47	2954.55	3343.19
PgrPIP1.3	0.346134	0.488461	0.0487567	0.652279	0.395557	0.0846833	0.395318	0.345993	0	3.1839
PgrPIP1.5	218.472	484.522	580.095	50.2533	608.572	76.863	108.371	1467.87	117.255	675.661
PgrPIP2.1	611.929	489.84	80.4439	163.912	157.644	1071.82	656.548	264.033	602.541	539.675
PgrPIP2.2	106.931	159.447	64.2391	3.36305	11.9106	73.8696	84.7965	109.7	8.04796	27.1453
PgrPIP2.4	1833.45	424.286	543.16	2233.45	2459.11	1181.97	229.935	252.329	1283.18	1112.13
PgrPIP2.5	171.862	299.138	130.12	16.6679	16.4747	144.534	79.7236	163.142	78.3742	122.53
PgrPIP2.6	420.282	450.391	330.709	77.9779	32.2628	602.979	288.257	336.961	252.907	214.848
PgrPIP2.7	0.209877	0.375628	1.89332	0	0	0.630852	1.74723	0.442705	0	0.0366733
PgrPIP2.8	1.61444	1.77124	1.26891	0.0374707	0	1.56212	1.19608	0.458614	0.0965427	0.204637
PgrXIP1.1	1.67244	2.12727	0.29166	0	0.033693	0.349599	0.025247	0	0	0
PgrSIP1.1	10.3316	10.5729	24.9059	13.3643	15.6948	9.54528	7.91122	17.308	12.6643	10.3501
PgrSIP1.2	358.487	214.411	200.284	372.162	316.491	307.509	152.355	142.958	397.439	308.668

## Sheet: Figure 6  Raw data
Sample	Fresh weight	Drought weight	water content
D-I-50	1.88	0.2902	0.845638
D-I-50	2.425	0.3202	0.867959
D-I-50	2.73	0.4743	0.826264
D-I-95	0.85	0.4186	0.507529
D-I-95	0.756	0.4213	0.442725
D-I-95	0.8627	0.4526	0.475368
D-I-140	0.681	0.3667	0.461527
D-I-140	1.116	0.5848	0.475986
D-I-140	1.1753	0.6409	0.454692
D-O-95	6.055	0.5877	0.90294
D-O-95	5.43	0.599	0.889687
D-O-95	5.527	0.666	0.879501
D-O-140	4.76	0.763	0.839706
D-O-140	5.154	0.7945	0.845848
D-O-140	3.873	0.5947	0.84645
T-I-50	1.2	0.1396	0.883667
T-I-50	1.274	0.1515	0.881083
T-I-50	1.25	0.1448	0.88416
T-I-95	0.514	0.1925	0.625486
T-I-95	0.525	0.1939	0.630667
T-I-95	0.9784	0.1948	0.800899
T-I-140	0.7945	0.4733	0.404279
T-I-140	0.837	0.3432	0.589964
T-I-140	0.515	0.2055	0.600971
T-O-95	3.29	0.4025	0.87766
T-O-95	2.92	0.337	0.884589
T-O-95	3.757	0.407	0.891669
T-O-140	4.897	0.69	0.859097
T-O-140	5.94	0.857	0.855724
T-O-140	5.312	0.722	0.864081
