# Supplementary material for: Genome-wide identification of candidate aquaporins involved in water accumulation of pomegranate outer seed coat
Source: PeerJ. 2021 Jul 15;9:e11810. doi: 10.7717/peerj.11810 (PMC8286702; doi:10.7717/peerj.11810)
Supplement: Supplemental Information 3 [file peerj-09-11810-s003.xlsx]

## Sheet: Dabenzi
PgrPIP1.2				PgrSIP1.2				PgrPIP2.4
D-I-50	84.66	2139.37		D-I-50	84.66	358.487		D-I-50	84.66	1833.45
D-I-95	47.52	1520.09		D-I-95	47.52	214.411		D-I-95	47.52	424.286
D-I-140	46.41	1589.79		D-I-140	46.41	200.284		D-I-140	46.41	543.16
D-O-95	89.07	2420.96		D-O-95	89.07	372.162		D-O-95	89.07	2233.45
D-O-145	84.4	2138.29		D-O-145	84.4	316.491		D-O-145	84.4	2459.11

## Sheet: Tunisia
PgrPIP1.2				PgrSIP1.2				PgrPIP2.4
D-I-50	88.3	2289.54		D-I-50	88.3	307.509		D-I-50	88.3	1181.97
D-I-95	68.57	1480		D-I-95	68.57	152.355		D-I-95	68.57	229.935
D-I-140	53.17	1393.47		D-I-140	53.17	142.958		D-I-140	53.17	252.329
D-O-95	88.46	2954.55		D-O-95	88.46	397.439		D-O-95	88.46	1283.18
D-O-145	85.96	2743.19		D-O-145	85.96	308.668		D-O-145	85.96	1112.13
