# Supplementary material for: Genome-wide identification of candidate aquaporins involved in water accumulation of pomegranate outer seed coat
Source: PeerJ. 2021 Jul 15;9:e11810. doi: 10.7717/peerj.11810 (PMC8286702; doi:10.7717/peerj.11810)
Supplement: Supplemental Information 4 [file peerj-09-11810-s004.xlsx]

## Sheet: Sheet1
PgrPIP1.1-0h	1		PgrPIP1.2-0h	1		PgrPIP1.3-0h	1		PgrPIP1.5-0h	1		PgrPIP2.1-0h	1		PgrPIP2.4-0h	1
PgrPIP1.1-0h	0.758669		PgrPIP1.2-0h	1.07903		PgrPIP1.3-0h	0.723451		PgrPIP1.5-0h	0.872468		PgrPIP2.1-0h	0.96288		PgrPIP2.4-0h	1.05852
PgrPIP1.1-0h	0.677284		PgrPIP1.2-0h	0.553391		PgrPIP1.3-0h	0.667028		PgrPIP1.5-0h	0.665051		PgrPIP2.1-0h	0.848705		PgrPIP2.4-0h	0.787444
PgrPIP1.1-1h	0.431417		PgrPIP1.2-1h	0.527184		PgrPIP1.3-1h	0.556107		PgrPIP1.5-1h	0.601416		PgrPIP2.1-1h	0.383571		PgrPIP2.4-1h	0.551535
PgrPIP1.1-1h	0.52259		PgrPIP1.2-1h	0.788738		PgrPIP1.3-1h	0.659915		PgrPIP1.5-1h	0.738407		PgrPIP2.1-1h	0.436596		PgrPIP2.4-1h	0.719193
PgrPIP1.1-1h	0.410665		PgrPIP1.2-1h	0.519451		PgrPIP1.3-1h	0.941986		PgrPIP1.5-1h	0.768871		PgrPIP2.1-1h	0.436211		PgrPIP2.4-1h	0.735908
PgrPIP1.1-12h	0.419948		PgrPIP1.2-12h	0.0295187		PgrPIP1.3-12h	0.318812		PgrPIP1.5-12h	0.846957		PgrPIP2.1-12h	0.53309		PgrPIP2.4-12h	0.955333
PgrPIP1.1-12h	0.425167		PgrPIP1.2-12h	0.0356723		PgrPIP1.3-12h	0.350366		PgrPIP1.5-12h	0.695161		PgrPIP2.1-12h	0.477499		PgrPIP2.4-12h	0.830101
PgrPIP1.1-12h	0.373672		PgrPIP1.2-12h	0.0691738		PgrPIP1.3-12h	0.351632		PgrPIP1.5-12h	0.898219		PgrPIP2.1-12h	0.447021		PgrPIP2.4-12h	0.756763
PgrPIP1.1-24h	0.245548		PgrPIP1.2-24h	0.121598		PgrPIP1.3-24h	0.462421		PgrPIP1.5-24h	1.41268		PgrPIP2.1-24h	0.378189		PgrPIP2.4-24h	0.249252
PgrPIP1.1-24h	0.380647		PgrPIP1.2-24h	0.166354		PgrPIP1.3-24h	0.477182		PgrPIP1.5-24h	1.24702		PgrPIP2.1-24h	0.590246		PgrPIP2.4-24h	0.158053
PgrPIP1.1-24h	0.293646		PgrPIP1.2-24h	0.287141		PgrPIP1.3-24h	0.482541		PgrPIP1.5-24h	1.48105		PgrPIP2.1-24h	0.373487		PgrPIP2.4-24h	0.137102
