# Supplementary material for: Genome-wide identification of candidate aquaporins involved in water accumulation of pomegranate outer seed coat
Source: PeerJ. 2021 Jul 15;9:e11810. doi: 10.7717/peerj.11810 (PMC8286702; doi:10.7717/peerj.11810)
Supplement: Supplemental Information 8 [file peerj-09-11810-s008.xlsx]

## Sheet: Sheet1
Table S1. List of primers used in this study.
Primer for qRT-PCR	Forward primers (5'-3')	Reverse primers (5'-3')
PgrPIP1.1	CCATGCCATTCAAATCCA	AAAATTACAAAGGGCTTCAGTTA
PgrPIP1.3	GCCAACTGTGAAGCCAAA	CAACCCCAGATTAAAAAACAA
PgrPIP1.5	GCTTGCTGCCCTATACCAC	TGGAAATTGCTCGATGGTC
PgrPIP2.4	CGGTTAAAGCTCTGAGTTCCT	CGGGCCAAGATTCTAGCT
PgrPIP2.1	CTTCCGCAGCAACCCCACCAACT	TCCGTCGTCATCATCATCCATCC
PgrPIP1.2	CAGGTTATCATCAGAGCCATTC	GCATAGCAGCGGGAAGATA
PgrActin	TATTGTTGGTCGTCCCAGGC	CCTCTCTTCGATTGGGCCTC
