# Supplementary material for: Genome-wide identification of candidate aquaporins involved in water accumulation of pomegranate outer seed coat
Source: PeerJ. 2021 Jul 15;9:e11810. doi: 10.7717/peerj.11810 (PMC8286702; doi:10.7717/peerj.11810)
Supplement: Supplemental Information 9 [file peerj-09-11810-s009.xlsx]

## Sheet: Sheet1
Table S2 Characteristics of PgrAQP in pomegranate.
Gene name	Gene ID	protein length(aa)	Molecular weight (KDa)	Isoelectric point (pI)	Subcellular localization	Grand average of hydropathicity (GRAVY)	Transmembrane domains (TMDs)	Transport functions predicted by TMDs
PgrNIP1.1	rna-XM_031534513.1	278	29.75	8.9	PM	0.449	6	YES
PgrNIP1.2	rna-XM_031531116.1	283	30.07	8.28	PM	0.439	5	NO
PgrNIP2.1	rna-XM_031548105.1	294	31.07	8.47	PM	0.203	5	NO
PgrNIP4.1	rna-XM_031541368.1	278	29.52	6.95	PM	0.572	6	YES
PgrNIP4.2	rna-XM_031544411.1	270	28.62	9.3	PM	0.67	6	YES
PgrNIP5.1	rna-XM_031520655.1	245	25.76	8.98	PM	0.244	4	NO
PgrNIP7.1	rna-XM_031542562.1	304	32.31	6.05	PM	0.402	6	YES
PgrNIP3.1	rna-XM_031521241.1	280	29.9	8.34	PM	0.693	5	NO
PgrTIP1.1	rna-XM_031551983.1	252	25.91	5.29	Vacuolar	0.348	6	YES
PgrTIP1.2	rna-XM_031529424.1	252	25.88	5.64	Vacuolar	0.815	6	YES
PgrTIP1.3	rna-XM_031527634.1	250	25.72	5.54	Vacuolar	0.795	6	YES
PgrTIP1.5	rna-XM_031544235.1	251	26.03	5.16	Vacuolar	0.759	6	YES
PgrTIP1.6	rna-XM_031539566.1	251	25.94	5.56	Vacuolar	0.747	6	YES
PgrTIP1.7	rna-XM_031528972.1	252	25.98	6.21	Vacuolar	0.741	6	YES
PgrTIP1.8	rna-XM_031533544.1	258	27.28	5.81	Vacuolar	0.769	7	YES
PgrTIP2.1	rna-XM_031528621.1	248	25.22	5.69	Vacuolar	0.688	7	YES
PgrTIP2.3	rna-XM_031523504.1	250	25.39	5.06	Vacuolar	0.897	6	YES
PgrTIP3.1	rna-XM_031549601.1	261	27.98	6.75	Vacuolar	0.558	6	YES
PgrTIP3.2	rna-XM_031518979.1	359	27.6	8.02	Vacuolar	0.626	6	YES
PgrTIP4.1	rna-XM_031515702.1	247	25.87	5.92	Vacuolar	0.872	7	YES
PgrTIP5.1	rna-XM_031542476.1	264	27.24	7.79	Vacuolar	0.673	6	YES
PgrTIP5.2	rna-XM_031527540.1	259	26.32	6.56	Vacuolar	0.727	6	YES
PgrPIP1.1	rna-XM_031518398.1	287	30.66	8.83	PM	0.402	6	YES
PgrPIP1.2	rna-XM_031535921.1	287	30.93	8.84	PM	0.374	6	YES
PgrPIP1.3	rna-XM_031531447.1	287	30.68	9.13	PM	0.41	6	YES
PgrPIP1.4	rna-XM_031542856.1	289	31.41	8.72	PM	0.364	6	YES
PgrPIP1.5	rna-XM_031527033.1	289	30.81	8.6	PM	0.422	6	YES
PgrPIP2.1	rna-XM_031524349.1	281	29.97	9.13	PM	0.468	6	YES
PgrPIP2.2	rna-XM_031518115.1	286	30.58	8.75	Chloroplast	0.492	6	YES
PgrPIP2.3	rna-XM_031527906.1	283	30.03	9	PM	0.53	6	YES
PgrPIP2.4	rna-XM_031523140.1	289	30.8	9.14	PM	0.493	6	YES
PgrPIP2.5	rna-XM_031542347.1	285	30.27	5.8	PM	0.441	5	NO
PgrPIP2.6	rna-XM_031523675.1	288	30.82	8.22	PM	0.441	6	YES
PgrPIP2.7	rna-XM_031546977.1	286	30.64	6.94	PM	0.432	6	YES
PgrPIP2.8	rna-XM_031532117.1	286	30.65	6.95	PM	0.416	6	YES
PgrXIP2.1	rna-XM_031523827.1	317	33.2	5.87	PM	0.641	6	YES
PgrSIP1.1	rna-XM_031537436.1	241	25.31	10.16	Chloroplast	0.746	5	NO
PgrSIP1.2	rna-XM_031538645.1	240	25.28	7.81	Vacuolar	0.813	5	NO
