# Supplementary material for: Genome-wide identification of candidate aquaporins involved in water accumulation of pomegranate outer seed coat
Source: PeerJ. 2021 Jul 15;9:e11810. doi: 10.7717/peerj.11810 (PMC8286702; doi:10.7717/peerj.11810)
Supplement: Supplemental Information 10 [file peerj-09-11810-s010.xlsx]

## Sheet: Sheet1
Table S3. Proteins sequence similarity matrix between members of PgrAQP genes
Seq->	PgrSIP1.1	PgrSIP1.2	PgrXIP2.1	PgrPIP1.1	PgrPIP1.3	PgrPIP1.2	PgrPIP1.4	PgrPIP1.5	PgrPIP2.1	PgrPIP2.2	PgrPIP2.7	PgrPIP2.8	PgrPIP2.5	PgrPIP2.6	PgrPIP2.3	PgrPIP2.4	PgrTIP1.1	PgrTIP1.2	PgrTIP1.3	PgrTIP1.5	PgrTIP1.6	PgrTIP1.7	PgrTIP1.8	PgrTIP2.1	PgrTIP2.3	PgrTIP3.1	PgrTIP3.2	PgrTIP4.1	PgrTIP5.1	PgrTIP5.2	PgrNIP1.1	PgrNIP1.2	PgrNIP2.1	PgrNIP4.1	PgrNIP4.2	PgrNIP5.1	PgrNIP7.1	PgrNIP3.1
PgrSIP1.1	100
PgrSIP1.2	54.5833	100
PgrXIP2.1	15.4	19.5833	100
PgrPIP1.1	17.4274	16.6667	18.8153	100
PgrPIP1.3	17.8423	17.0833	19.5122	83.2753	100
PgrPIP1.2	15.3527	19.5833	19.1638	80.4878	83.9721	100
PgrPIP1.4	16.5975	17.5	19.3772	77.0035	78.0488	75.2613	100
PgrPIP1.5	16.5975	17.5	19.3772	86.0627	85.3659	83.6237	76.8166	100
PgrPIP2.1	17.4274	17.0833	21.3523	66.9039	66.1922	64.4128	63.7011	66.9039	100
PgrPIP2.2	19.917	17.9167	20.2797	65.035	65.035	62.2378	61.1888	64.6853	79.715	100
PgrPIP2.7	18.6722	17.5	19.9301	66.0839	66.0839	62.9371	61.5385	65.3846	81.494	88.8112	100
PgrPIP2.8	19.917	18.3333	20.2797	65.035	65.7343	62.5874	60.8392	65.3846	83.985	86.3636	93.007	100
PgrPIP2.5	18.2573	16.6667	20.7018	65.2632	64.5614	60.3509	59.6491	64.5614	76.868	81.4035	83.5088	84.2105	100
PgrPIP2.6	19.917	15.8333	20.1389	65.5052	65.5052	62.3693	59.7222	63.8889	81.138	84.2657	86.7133	87.7622	85.9649	100
PgrPIP2.3	19.0871	16.6667	20.4947	68.1979	66.0777	63.2509	62.1908	65.0177	80.071	84.4523	84.4523	81.9788	78.7986	82.6855	100
PgrPIP2.4	19.0871	17.5	20.7612	64.4599	63.0662	60.9756	58.8235	60.2076	75.089	79.7203	79.3706	76.5734	74.386	75.6944	89.7527	100
PgrTIP1.1	18.2573	17.0833	21.0317	25.7937	26.1905	25.7937	23.4127	26.9841	26.587	27.381	26.9841	28.5714	27.381	27.381	28.9683	26.1905	100
PgrTIP1.2	17.8423	19.5833	20.6349	25.7937	26.9841	25.7937	24.2063	26.9841	28.174	28.5714	28.1746	29.3651	29.7619	28.5714	30.5556	28.1746	84.9206	100
PgrTIP1.3	20.332	19.1667	20.8	25.6	26.4	26.8	24.8	26.8	28.8	28	28.8	30	29.6	29.6	30	28.4	73.6	72	100
PgrTIP1.5	18.6722	20	20.3187	26.2948	26.6932	25.8964	24.7012	27.49	29.482	28.2869	29.0837	29.4821	30.2789	28.6853	29.0837	27.8884	79.6813	87.6494	70.4	100
PgrTIP1.6	18.2573	21.25	20.3187	25.8964	26.2948	25.498	23.9044	26.2948	27.888	27.0916	27.49	28.6853	27.8884	27.8884	25.8964	25.8964	82.0717	83.2669	73.2	83.2669	100
PgrTIP1.7	17.8423	22.0833	21.4286	23.4127	24.2063	23.4127	22.2222	25	25.793	25	25.3968	26.9841	26.5873	25.7937	26.5873	25.3968	71.0317	80.1587	63.6	75.2988	68.9243	100
PgrTIP1.8	17.8423	16.6667	18.6047	25.969	25.969	26.7442	23.2558	26.7442	25.581	27.907	27.907	28.6822	27.1318	26.7442	27.907	24.4186	69.8413	70.6349	63.2	72.51	77.2908	63.492	100
PgrTIP2.1	15.7676	16.6667	19.7581	28.2258	30.6452	27.8226	26.6129	30.2419	30.645	29.8387	30.6452	31.4516	30.2419	31.0484	32.6613	28.2258	58.871	57.6613	55.24	57.2581	62.9032	49.596	54.8387	100
PgrTIP2.3	19.0871	17.9167	19.6	27.2	28	28	24	28.4	28.4	28.8	29.2	29.6	28	28.8	30.8	26.8	58.8	58	52	54.8	60.4	50.4	53.2	75	100
PgrTIP3.1	18.6722	18.3333	22.9885	24.9042	25.6705	24.1379	23.7548	24.9042	25.67	21.8391	26.0536	26.8199	25.6705	26.4368	23.7548	23.3716	55.1587	53.9683	51.6	52.988	56.5737	48.412	49.6124	50	47.6	100
PgrTIP3.2	19.0871	17.5	21.6216	25.8687	27.027	25.0965	23.9382	27.027	26.254	25.8687	26.6409	27.4131	26.2548	27.7992	26.2548	23.9382	46.4286	44.0476	47.2	45.0199	50.1992	40.079	46.8992	47.5806	44	64.4788	100
PgrTIP4.1	18.2573	18.75	18.6235	24.6964	25.5061	24.2915	20.6478	23.8866	23.076	21.8623	23.4818	26.7206	24.6964	22.6721	23.0769	22.2672	50.6073	50.2024	48.17	49.3927	52.6316	48.987	48.9879	53.0364	52.63	42.915	42.5101	100
PgrTIP5.1	19.0871	19.5833	15.9091	23.1061	22.7273	23.1061	22.7273	22.3485	24.242	25	25.3788	25	24.2424	25.7576	26.1364	25.7576	36.9048	38.0952	36.4	39.0438	39.4422	35.317	34.1085	46.7742	45.6	39.0805	38.2239	35.6275	100
PgrTIP5.2	17.0124	19.5833	16.6023	23.9382	24.3243	22.3938	23.5521	24.7104	24.324	23.5521	23.9382	24.7104	24.3243	25.0965	23.5521	22.7799	41.6667	38.8889	39.2	40.6375	43.0279	35.714	39.1473	46.371	48.8	37.4517	37.8378	38.0567	41.6988	100
PgrNIP1.1	16.5975	18.3333	16.6078	19.4346	20.4947	19.4346	19.4346	20.1413	20.996	19.4346	19.788	19.788	19.0813	19.788	20.4947	20.4947	25.3968	25	23.6	25.0996	23.9044	25	22.093	25.4032	24	23.7548	23.9382	23.4818	23.8636	20.8494	100
PgrNIP1.2	17.8423	16.6667	17.6259	19.0647	20.8633	19.0647	19.4245	20.8633	17.985	19.7842	20.8633	20.1439	20.5036	20.5036	21.9424	21.5827	27.7778	28.9683	25.2	29.0837	26.6932	26.587	23.6434	27.8226	26.4	23.3716	22.7799	25.9109	22.7273	21.2355	66.1871	100
PgrNIP2.1	15.7676	16.25	17.6871	19.1638	17.0732	19.5122	17.301	17.6471	19.928	18.5315	17.8322	20.979	18.9474	19.0972	19.788	19.7232	24.6032	25	26.4	25.498	25.8964	23.809	23.2558	27.8226	27.2	21.4559	23.5521	30.7692	22.3485	22.3938	36.7491	41.3669	100
PgrNIP4.1	19.0871	15.4167	19.0647	21.5827	21.223	18.705	21.223	21.223	20.863	20.5036	21.5827	21.223	20.5036	21.223	21.9424	20.8633	26.1905	26.1905	25.6	27.49	25.0996	25.396	23.6434	27.4194	27.2	24.1379	24.3243	25.9109	23.1061	22.0077	51.4388	46.7626	38.4892	100
PgrNIP4.2	15.7676	15.8333	15.9259	15.5556	17.7778	18.1481	17.7778	18.5185	15.925	15.9259	15.9259	16.2963	17.7778	15.9259	18.5185	18.1481	26.9841	26.1905	24	26.2948	26.6932	23.809	23.2558	27.4194	26.8	22.6054	21.6216	27.1255	21.9697	21.6216	53.3333	55.5556	44.8148	60.3704	100
PgrNIP5.1	13.278	12.5	15.9184	14.6939	17.551	16.3265	15.9184	16.7347	15.918	14.6939	14.2857	18.3673	17.9592	14.6939	13.8776	17.551	19.1837	19.5918	20.4	18.7755	16.7347	18.775	15.5102	22.0408	21.22	17.551	18.3673	16.7347	16.7347	18.3673	34.6939	34.2857	32.6531	31.4286	33.0612	100
PgrNIP7.1	15.3527	17.9167	16.7763	18.1185	18.4669	14.6341	15.917	17.6471	18.861	18.1818	17.8322	18.5315	17.8947	17.7083	17.3145	17.9931	22.619	23.0159	26	22.3108	23.506	22.222	23.2558	27.4194	25.2	21.0728	22.0077	24.2915	22.7273	20.4633	32.5088	29.4964	31.2925	29.1367	33.3333	30.2041	100
PgrNIP3.1	17.8423	19.5833	17.5	21.0714	21.4286	19.6429	20.7143	20.3571	22.5	21.0714	21.0714	21.0714	21.4286	21.0714	21.4286	21.0714	25.3968	25.3968	25.2	27.49	25.498	22.619	25.1938	28.629	27.2	26.0536	23.5521	27.5304	23.1061	22.7799	37.1429	36.6906	31.7857	36.6906	36.6667	26.9388	26.0714	100
