# Supplementary material for: Genome-wide identification of candidate aquaporins involved in water accumulation of pomegranate outer seed coat
Source: PeerJ. 2021 Jul 15;9:e11810. doi: 10.7717/peerj.11810 (PMC8286702; doi:10.7717/peerj.11810)
Supplement: Supplemental Information 12 [file peerj-09-11810-s012.xlsx]

## Sheet: Arabidopsis thaliana
Duplicated gene pairs (TIP subfamily)			Duplicated gene pairs (PIP subfamily)			Duplicated gene pairs (NIP subfamily)			Duplicated gene pairs (SIP subfamily)
AtTIP2.2	PgrTIP2.3		AtPIP1.5	PgrPIP1.3		AtNIP1.2	PgrNIP1.2		AtSIP1.1	PgrSIP1.2
AtTIP2.3	PgrTIP2.3		AtPIP2.2	PgrPIP2.6		AtNIP7.1	PgrNIP7.1		AtSIP1.2	PgrSIP1.2
AtTIP1.1	PgrTIP1.8		AtPIP2.8	PgrPIP2.1		AtNIP4.1	PgrNIP4.1
AtTIP2.1	PgrTIP2.1		AtPIP2.1	PgrPIP2.6
AtTIP4.1	PgrTIP4.1		AtPIP2.4	PgrPIP2.6
			AtPIP2.4	PgrPIP2.8
			AtPIP1.3	PgrPIP1.2
			AtPIP1.5	PgrPIP2.8
			AtPIP2.2	PgrPIP2.5
			AtPIP2.1	PgrPIP2.5
			AtPIP2.4	PgrPIP2.5
			AtPIP2.2	PgrPIP2.7
			AtPIP2.4	PgrPIP2.7
			AtPIP2.5	PgrPIP2.2

## Sheet: Vitis vinifera
Duplicated gene pairs (TIP subfamily)			Duplicated gene pairs (PIP subfamily)			Duplicated gene pairs (NIP subfamily)			Duplicated gene pairs (SIP subfamily)
VvTIP5.1	PgrTIP5.2		VvPIP1.2	PgrPIP1.3		VvNIP1.1	PgrNIP4.2		VvSIP1.1	PgrSIP1.2
VvTIP1.1	PgrTIP1.2		VvPIP2.2	PgrPIP2.1		VvNIP1.1	PgrNIP1.2
VvTIP1.3	PgrTIP1.8		VvPIP2.4	PgrPIP2.3		VvTIP3.1	PgrNIP4.2
VvTIP1.2	PgrTIP1.8		VvPIP2.4	PgrPIP2.6
VvTIP2.1	PgrTIP2.1		VvPIP2.1	PgrPIP2.3
VvTIP1.3	PgrTIP1.6		VvPIP2.1	PgrPIP2.6
VvTIP1.2	PgrTIP1.6		VvPIP1.1	PgrPIP1.5
VvTIP1.1	PgrTIP1.5		VvPIP2.3	PgrPIP2.6
VvTIP1.1	PgrTIP1.1		VvPIP2.3	PgrPIP2.3
VvTIP3.1	PgrTIP3.2		VvPIP2.4	PgrPIP2.8
			VvPIP2.1	PgrPIP2.8
			VvPIP2.3	PgrPIP2.8
			VvPIP1.2	PgrPIP1.2
			VvPIP1.3	PgrPIP1.2
			VvPIP2.4	PgrPIP2.5
			VvPIP2.1	PgrPIP2.5
			VvPIP2.3	PgrPIP2.5
			VvPIP2.4	PgrPIP2.7
			VvPIP2.1	PgrPIP2.7
			VvPIP2.3	PgrPIP2.7
			VvTIP4.1	PgrPIP2.2
			VvPIP2.1	PgrPIP2.2
			VvPIP1.1	PgrPIP1.1
			VvPIP2.3	PgrPIP2.2

## Sheet: Eucalyptus grandis
Duplicated gene pairs (TIP subfamily)			Duplicated gene pairs (PIP subfamily)			Duplicated gene pairs (NIP subfamily)			Duplicated gene pairs (SIP subfamily)			Duplicated gene pairs (XIP subfamily)
EgTIP2.2	PgrTIP2.3		EgPIP1.2	PgrPIP1.3		EgNIP1.1	PgrNIP4.2		EgSIP1.2	PgrSIP1.2		EgXIP1.1	PgrXIP2.1
EgTIP5.2	PgrTIP5.2		EgPIP1.3	PgrPIP1.3		EgNIP1.3	PgrNIP1.2		EgSIP1.1	PgrSIP1.1
EgTIP1.3	PgrTIP1.2		EgPIP1.1	PgrPIP1.5		EgNIP4.1	PgrNIP4.1
EgTIP2.1	PgrTIP2.1		EgPIP2.1	PgrPIP2.3		EgNIP7.1	PgrNIP7.1
EgTIP1,5	PgrTIP1.2		EgPIP1.4	PgrPIP1.5		EgNIP4.2	PgrNIP4.2
EgTIP5.1	PgrTIP5.1		EgPIP2.4	PgrPIP2.6		EgNIP2.1	PgrNIP2.1
EgTIP1.3	PgrTIP1.5		EgPIP2.4	PgrPIP2.8
EgTIP1,5	PgrTIP1.5		EgPIP2.1	PgrPIP2.8
EgTIP3.1	PgrTIP3.1		EgPIP1.2	PgrPIP1.2
EgTIP3.4	PgrTIP3.1		EgPIP1.3	PgrPIP1.2
EgTIP1.3	PgrTIP1.1		EgPIP2.4	PgrPIP2.5
EgTIP4.1	PgrTIP4.1		EgPIP2.4	PgrPIP2.7
EgTIP3.1	PgrTIP3.2		EgPIP2.1	PgrPIP2.7
EgTIP1.1	PgrTIP1.1		EgPIP1.1	PgrPIP1.1
EgTIP1,5	PgrTIP1.1		EgPIP2.1	PgrPIP2.2
EgTIP3.4	PgrTIP3.2		EgPIP1.4	PgrPIP1.1
