# Supplementary material for: Genome-wide identification of candidate aquaporins involved in water accumulation of pomegranate outer seed coat
Source: PeerJ. 2021 Jul 15;9:e11810. doi: 10.7717/peerj.11810 (PMC8286702; doi:10.7717/peerj.11810)
Supplement: Supplemental Information 13 [file peerj-09-11810-s013.xlsx]

## Sheet: Sheet1
Table S10. Expression patterns of PgrAQPs in different tissues of pomegranate plants
Gene name	Root	Flower	Leaf	Peel 1	Peel 2	Peel 3	Inner seed coat 1	Inner seed coat 2	Inner seed coat 3	Outer seed coat 1	Outer seed coat 2	Outer seed coat 3
PgrNIP1.1	8.08	0	2.31	0	0	0.37	0.18	1.99	0.37	0.31	0.52	0
PgrNIP1.2	0.58	0.91	0.39	0.58	1.08	0	0	0.9	2.78	0.47	0.35	0
PgrNIP1.3	0	66.44	0	0.2	0.19	0	0.56	0	0	0	0	0
PgrNIP2.1	2.65	0.19	1.02	0	0.19	0.58	0	0	0	0	5.17	14.55
PgrNIP4.1	56.38	60.62	64.7	23.15	12.3	3.83	1.25	1.01	6.97	8.03	8.71	6.84
PgrNIP5.1	85.2	33.07	8.28	9.76	5.78	14.3	0.16	0	0	4.6	0.8	0.16
PgrNIP7.1	0.17	0.17	0	0.18	0.66	1	0	0	0.34	0.14	0.16	0
PgrNIP8.1	1.04	0	0	0	0	0	0	0	0	0	0	0
PgrTIP1.1	10.49	65.47	38.76	11.41	0.2	13.07	0	0.2	0.41	0.17	15.92	1.76
PgrTIP1.2	45.8	0.2	0.21	0	0	0	0	0	0.21	0.17	0	0
PgrTIP1.4	260.1	501.79	173.79	83.88	22.55	25.63	0	0	3.11	1.05	1.95	16.34
PgrTIP1.6	374.03	541.28	75.28	3.03	1.21	0.21	0	0	0.62	0.7	0	0
PgrTIP1.7	0	0.16	0	0	0	0	0	0	0	21.15	2.88	0.15
PgrTIP1.8	10.64	656.71	59.5	37.57	112.41	22.49	11.87	3.92	0.4	0.68	0.38	0
PgrTIP2.1	214.09	373.88	233.38	8.54	1.22	0.21	0.2	0	0	1.95	0	1.2
PgrTIP2.3	91.97	2.04	2.16	8.9	1.42	2.68	4.43	0	0	4.21	1.17	0
PgrTIP4.1	22.31	10.15	1.31	5.94	2.25	0.83	0.2	0	0	1.07	0.2	0
PgrTIP5.1	0	3.95	0	0	0	0	0	0	0.2	0	0.38	0
PgrTIP5.2	0	20.27	0	0	0	0	0	0	0	0	0	0
PgrPIP1.1	872.25	21.69	7.82	85.22	14.65	76.73	7.29	0.17	0.36	144.12	75.97	15.03
PgrPIP1.2	674.6	3456.37	1804.33	2658.94	3247.45	2654.06	2943	2294.1	2674.97	929.56	2343.11	1789.12
PgrPIP1.3	1.18	0.45	0	0.24	0.22	0	0	0	0	0	0	0.22
PgrPIP1.5	236.79	232.25	100.31	26.22	117.19	2268.47	2.24	27.06	1159.55	1.05	61.14	329.54
PgrPIP2.1	161.31	1491.07	842.26	862.82	663.22	65.76	143.61	119.04	68.83	189.68	112.28	38.43
PgrPIP2.2	112.65	330.58	820.46	12.88	5.64	14.73	1.23	0.71	47.18	74.63	43.28	37.66
PgrPIP2.4	947.77	250.78	73.6	486.17	808.38	493.32	3353.43	4304.89	3862.19	339.19	397.7	388.22
PgrPIP2.5	17.76	166.17	48.06	65.9	110.31	366.85	4.57	7.15	23.61	10.05	103.59	40.31
PgrPIP2.6	78.36	145.63	178.37	92	119.02	108.66	104.61	17.06	14.84	27.93	61.7	114.9
PgrPIP2.7	10.57	148.73	263.57	6.08	0.53	3.61	0	0	0	0	0.86	0.87
PgrPIP2.8	0	0	1.29	0	0	0	0	0	0.18	0.3	0	0.68
PgrXIP1.1	2.17	1.9	0	1.35	0.31	0.64	0.16	0	0	0.68	0	0
PgrSIP1.1	15.05	6.81	4.05	12.87	11.15	14.99	17.8	7.38	8.23	4.38	9.36	15.42
PgrSIP1.2	146.27	179.9	60.29	142.93	187.07	292.4	383.41	207.16	183.56	100.78	104.9	148.86

## Sheet: Sheet2
Table S6. Expression patterns of PgrAQPs in different tissues of pomegranate plants
Gene name	D-50	T-50	D-I-95	T-I-95	D-I-140	T-I-140	D-O-95	T-O-95	D-O-140	T-O-140
PgNIP1.1	3.3915	4.55607	3.2117	1.53188	0.223532	0.725142	4.10132	1.20004	1.08846	3.15885
PgNIP1.2	1.83257	5.50591	1.53343	4.19985	0.589463	0.781482	1.19197	3.23507	2.32221	9.85766
PgNIP1.3	0.0861483	0.528228	0.0901213	0.0393763	0	0	0.04336	0.531195	0	0.0813193
PgNIP2.1	0.51003	0.0510767	0.978752	1.28717	19.3313	3.48621	0.0781403	0.0371127	0.0404317	0.0337473
PgNIP4.1	11.9993	8.83514	8.5121	19.0866	13.8114	12.9874	0.754377	1.87891	10.4537	5.56106
PgNIP5.1	4.05366	6.24037	2.11777	2.96816	0.688777	1.49153	0.0716107	0.148709	0.067655	0.929287
PgNIP7.1	0	1.74657	0.0167553	0.0798227	0	0	0	0.243528	0.0228	0.117017
PgNIP8.1	0	0	0.0167553	0	0	0.139104	0	0	0	0.0779983
PgTIP1.1	2.93825	0.434672	21.8106	0.348055	5.19617	1.8451	1.56267	0.20178	0.702767	3.02027
PgTIP1.2	0.734265	6.40047	0.0852543	0	0.0369607	0.0475017	0.130318	0	0.193563	0.0551
PgTIP1.4	21.8923	11.9719	26.7995	1.90687	20.7763	13.9172	2.3172	0.189794	5.50283	2.69141
PgTIP1.6	2.96279	0.755056	1.74109	0	0.0760657	0.129526	0.261331	0	0.751627	0.325962
PgTIP1.7	4.58729	0	1.04679	3.26821	0.682632	0.171893	0.031892	0	0.0564873	0.0783893
PgTIP1.8	11.0903	26.699	8.31871	1.98962	0.31048	1.18126	4.03641	15.6073	3.44793	32.3368
PgTIP2.1	15.3455	2.09709	2.87387	0.0323963	0.134487	0.234726	0.0415807	0	0	0
PgTIP2.3	44.2292	172.309	21.4998	13.5027	0.540382	0.875234	0.166256	5.83646	0.118442	0.0840613
PgTIP4.1	2.89412	5.75542	1.82283	1.05916	0	0	0.0420637	0.227038	0	0
PgTIP5.1	0.618432	0.504083	0.333663	0.66884	0	0	0	0.0525653	0.047108	0.021061
PgTIP5.2	0.359524	0.579942	0.141764	0.638062	0	0.0302	0	0	0	0.0981637
PgPIP1.1	414.703	116.692	474.116	1038.53	46.5179	20.9925	4.08139	13.0824	2.26296	1.01553
PgPIP1.2	1589.79	2289.54	1520.09	1480	2139.37	1393.47	2420.96	2954.55	2138.29	3343.19
PgPIP1.3	0.346134	0.0846833	0.488461	0.395318	0.0487567	0.345993	0.652279	0	0.395557	3.1839
PgPIP1.5	218.472	76.863	484.522	108.371	580.095	1467.87	50.2533	117.255	608.572	675.661
PgPIP2.1	611.929	1071.82	489.84	656.548	80.4439	264.033	163.912	602.541	157.644	539.675
PgPIP2.2	106.931	73.8696	159.447	84.7965	64.2391	109.7	3.36305	8.04796	11.9106	27.1453
PgPIP2.4	577.806	581.967	424.286	229.935	543.16	252.329	2233.45	1283.18	2459.11	2112.13
PgPIP2.5	171.862	144.534	299.138	79.7236	130.12	163.142	16.6679	78.3742	16.4747	122.53
PgPIP2.6	420.282	602.979	450.391	288.257	330.709	336.961	77.9779	252.907	32.2628	214.848
PgPIP2.7	0.209877	0.630852	0.375628	1.74723	1.89332	0.442705	0	0	0	0.0366733
PgPIP2.8	1.61444	1.56212	1.77124	1.19608	1.26891	0.458614	0.0374707	0.0965427	0	0.204637
PgXIP1.1	1.67244	0.349599	2.12727	0.025247	0.29166	0	0	0	0.033693	0
PgSIP1.1	10.3316	9.54528	10.5729	7.91122	24.9059	17.308	13.3643	12.6643	15.6948	10.3501
PgSIP1.2	258.487	307.509	214.411	282.355	200.284	222.958	372.162	397.439	316.491	308.668
